# Supplementary material
Source: publisher site journal article supplement (https://www.dovepress.com/article/376590)
Supplement: Supplementary file 1 [file get_supplementary_file.php]

# **Supplementary materials**

# **Supplementary text #1**

**Relationships between physical capacity and fat infiltration variables**

The interrelationships between the physical capacity variables and fat infiltration variables were analyzed using PCAs in all subjects together (R2cummulative=0.52) and in FM (R2cummulative=0.49) and in CON (R2cummulative=0.41) using the two first most important components (Table S1). The most important correlations are found in the first component (p1) in these analyses. These three analyses showed that physical capacity variables correlated negatively with several of the fat infiltration variables even though the variables differed somewhat across the groups. In all subjects together especially VAT and T-MFI but also ASAT and BMI correlated negatively with RPC, two grip-variables and TST according to p1.
In FM VAT and liver fat correlated negatively and strongest with the three grip-variables and TST but also with RPC and MaxVO2 as seen from p1.
While in CON four fat variables (VAT, ASAT and the two MFI variables) correlated negatively with self-reported variables of physical capacity (i.e., RPC, physical activity-4 days and physical activity-4 days min) (p1).

**Table S1:** PCA:s of the physical capacity variables and fat infiltration variables in all subjects together and in each of the two groups (FM and CON). The two most important components (p) are presented for each analysis (R2 and Q2 for each component are given at the bottom rows). For each component is given the most important loadings in bold type.

| Group | All |  | FM |  | CON |  |
| --- | --- | --- | --- | --- | --- | --- |
| Variables | p[1] | p[2] | p[1] | p[2] | p[1] | p[2] |
| Physical inactivity | 0.04 | -0.13 | 0.01 | -0.12 | 0.16 | 0.09 |
| Physical activity-2 Days | -0.12 | 0.21 | -0.11 | 0.22 | -0.08 | 0.12 |
| Physical activity-2 min | 0.03 | **0.28** | -0.08 | **0.29** | 0.09 | -0.01 |
| Physical activity-3 Days | -0.19 | 0.18 | -0.15 | 0.11 | -0.16 | -0.21 |
| Physical activity-3 min | -0.10 | 0.22 | -0.06 | 0.15 | -0.07 | -0.21 |
| Physical activity-4 Days | -0.21 | 0.08 | -0.17 | 0.02 | **-0.33** | -0.13 |
| Physical activity-4 min | -0.22 | 0.14 | -0.13 | 0.12 | **-0.32** | -0.11 |
| RPC | **-0.29** | 0.03 | **-0.25** | -0.01 | **-0.29** | -0.03 |
| MaxVO2 | -0.22 | 0.21 | **-0.26** | 0.16 | -0.03 | **-0.35** |
| Grip-max | **-0.27** | 0.15 | **-0.32** | 0.13 | -0.14 | -0.27 |
| Grip-average | **-0.29** | 0.10 | **-0.33** | 0.09 | -0.13 | -0.21 |
| Grip-endurance | -0.17 | 0.02 | **-0.32** | 0.09 | 0.07 | 0.05 |
| TST | **-0.27** | 0.01 | **-0.30** | 0.05 | -0.15 | 0.19 |
| BMI | **0.25** | **0.31** | 0.21 | **0.35** | 0.22 | **-0.35** |
| VAT | **0.28** | 0.25 | **0.27** | **0.30** | **0.28** | -0.25 |
| ASAT | **0.25** | **0.31** | 0.18 | **0.35** | **0.33** | **-0.29** |
| Liver fat | 0.24 | 0.14 | **0.27** | 0.18 | 0.01 | -0.15 |
| T-MFI | **0.27** | 0.18 | 0.23 | 0.25 | **0.38** | 0.03 |
| ES-MFI | 0.20 | 0.23 | 0.10 | 0.26 | **0.34** | -0.14 |
| T-FFV | -0.12 | **0.40** | -0.13 | **0.36** | -0.02 | **-0.41** |
| ES-FFV | -0.02 | **0.35** | -0.06 | **0.31** | -0.01 | -0.23 |
| Dev-T-FFV | **-0.26** | 0.18 | -0.26 | 0.14 | **-0.27** | -0.22 |
| R2 | 0.35 | 0.17 | 0.27 | 0.23 | 0.25 | 0.17 |
| Q2 | 0.26 | 0.11 | 0.05 | 0.15 | 0.10 | 0.01 |

For explanation of subjective physical activity variables see methods; RPC= Rating of Perceived Capacity; TST= timed-stands test. BMI= Body Mass Index; VAT=Visceral Adipose Tissue volume; ASAT=Abdominal Subcutaneous Adipose Tissue volume; T-MFI = Thigh Muscle Fat Infiltration; ES-MFI= Erector Spinae Muscle Fat Infiltration; T-FFV =Thigh Fat-free Muscle volume; ES-FFV= Erector Spinae Fat-free Muscle volume; Dev-T-FFV =deviations from expected T-FFV
